# Supplementary material
Source: PubMed Central journal article supplement (PMC2667770)
Supplement: M808683200_1.pdf [file M808683200_1.pdf]

## SUPPLEMENTARY FIGURE LEGENDS

**Supplementary Figure S1.** Sequence alignments of Krox20 amino acid sequences from different vertebrate species. The comparison reveals a relatively good evolutionary conservation of a large N-terminal domain (up to position 311), an almost complete identity over a region including the DNA binding domain (positions 312 to 425) and very poor conservation in the C-terminal domain. The two acidic regions are overlined in red. The previously described HCF-1 binding motif (HBM) is indicated by a red box. The isoleucine within the R1 domain involved in the interaction with Nab factors is indicated by a blue box. Numbers above the sequences correspond to the N-terminal extremities of the deletions.

**Supplementary Figure S2.** Analysis of *Nab* and *Hcf* expression in the chick developing hindbrain. (A-D) Whole mounted (A-C) and flat-mounted (D) hindbrains were prepared from chick embryos in situ hybridized with a *Nab* probe at the indicated somite stage (ss). At 7 ss, the expression of *Nab* is restricted to r3, whereas later on the gene is expressed in both r3 and r5. (E-J) Analysis of the expression of the chick *HCF* gene by in situ hybridization. Whole mounted (E-G, lateral views) and flat-mounted (H-J) hindbrains from embryos at the indicated somite stage (ss) are shown. In (F-J) co-hybridization was performed with a *Krox20* probe (orange). *HCF* is expressed in a decreasing gradient from the midbrain to the posterior part of the hindbrain and overlaps with the *Krox20*-positive domains (r3 and r5).

mouse MMTAKA VDKIPVTLSGFMHQLPDSL YPVEDLAA - - - SSVTIFPNGELGGPFDQMNGVAGD  
 human MMTAKA VDKIPVTLSGFVHQLSDNIYPVEDLAA - - - TSVTIFPNAELGGPFDQMNGVAGD  
 chick MMTAKA ADKIPVPLGGFPHQLPEGIYPADDTAAALPTSVAVIFPNADPAGPFDQMSGVAAAD  
 zebra -MTAKTL EKAPVSLGGFVHPLADSIYSVDELGTTLPASVTIYN - -DLGGHYEQIN - -AGD  
 xenopus -MAAKAVDKLPVTFGSFVHQIPEGFYPCEDSTLP - -ASVTIFPNVDLGGPLIQMSGVITGD

81

mouse GMINIDMTGKRPLDL P YPSSFAP - ISAPRNQ TFTYMGKFSIDPQYPGASCYPEGIINI V  
 human GMINIDMTGKRSLDL P YPSSFAP - VSAPRNQ TFTYMGKFSIDPQYPGASCYPEGIINI V  
 chick GMLGVDM - GDKRALDL P YGGGFAPGAPTSRNQ TFTYMGKFSIDPQYPGAGCYPEGIINI V  
 zebra GLINGDMSTEKRALDLAYSSTFAP - PACPRNQ TFTYMGKFSIDSQYPGN - WNP EGV IINI V  
 xenopus GMISVDMNNDKRS LDFSYSSNYPL - -APRTQPTAYMGKTSIDHQYS GSGWNTEGI FNLV

124 158 HBM

mouse SAGILQGVTPPASTT - -ASSSVTSASP NPLAT - - - - -GPLGVC TMSQTQPELDHLY  
 human SAGILQGVTPPASTT - -ASSSVTSASP NPLAT - - - - -GPLGVC TMSQTQPELDHLY  
 chick SAGILQGV SAPASAASAAASSAASSAS SSATAASAASPGALPGALGCGMAQGP P AEL EHL Y  
 zebra SAGILG - MTQPSSAS - -SSPASSVSPHFSS - - - - -TLSC TMAQN - QADM EHI Y  
 xenopus SAASLLGVPPSSCSS - TSSSNASSGSPN - - - - -LSCSMSHP - QSDL EHI Y

190 216

mouse SPPPPP P PYSGCTGDL Y - QDPS - AFLSPSTTSTSS LAYQPPPSYPS P KP - A MDPGLIPM  
 human SPPPPP P PYSGCAGDL Y - QDPS - AFLSAATSTSS LAYPPPSYPS P KP - A TDPGLFPM  
 chick SPPPP - -PYSGCG - ELY P QDPS SAFLPAAG - -GGALPFPPPSYPS P KAA A ADGGLFTV  
 zebra SPPPP - -YSGCG - EY Y - QDPS - AFLSTST - -CPI SYPPP - SYSS P KP - N ADSGLFPI  
 xenopus S - PPP - -YSSCN - ELY - QDPL - RFP CGSP - - -TAASL PPPPSYPS P KG - A S DGGMFPM

235 258 R site

mouse IPDYPGF F P - SPCQRP HGAAGPDRKPFPC LDSLRVPPPLTPLST I RNFTLGGP GAGVT  
 human IPDYPGF F P - SQCQDL HGTAGPDRKPFPC LD TLRVPPPLTPLST I RNFTLGGP SAGVT  
 chick IPEYGGF F P PQCQREL H - -AGPDRKPFPC LDSLRVPPPLTPLST I RNFTMGAAPAGAA  
 zebra IPDYAGF F Q - PQCQDMQ - -SMPDRKPFSCP LDSF KL PPLTPLNT I RNFTLGGP - - - -  
 xenopus IPDYSAL F P - PQCQDL H - - -SDRKPFPC - - -RHP - -SPLST I RNFTLGG S - - - -

309

mouse GPGASGGGEGPRLPGS - -GSA AVTATPYNPHHLPLRPI LRPRKYPNRPSK T P VHERPYP  
 human GPGASGGSEGPRLPGSS SAAAA AAAAAAYNPHHLPLRPI LRPRKYPNRPSK T P VHERPYP  
 chick PGSAPGGGGGGGAGEG - - - -ARLPAGAYS PHHLPLRPI LRPRKYPNRPSK T P VHERPYP  
 zebra - - - -GPDGPR - - - - -LPTAYTPQN LPLRPI LRPRKYPNRPSK T P VHERPYP  
 xenopus - - - -SEGPR - - - - -LASAYSQN LPLRPI LRPRKYPNRPSK T P VHERPYP

mouse CP AEGCDRRFSRSD E L T RHIR I HTGHKPFQCR ICMRNFSRSDH L T T H I R T H T GEK P F A C D  
 human CP AEGCDRRFSRSD E L T RHIR I HTGHKPFQCR ICMRNFSRSDH L T T H I R T H T GEK P F A C D  
 chick CP AEGCDRRFSRSD E L T RHIR I HTGHKPFQCR ICMRNFSRSDH L T T H I R T H T GEK P F A C D  
 zebra CP AEGCDRRFSRSD E L T RHIR I HTGHKPFQCR ICMRNFSRSDH L T T H I R T H T GEK P F A C D  
 xenopus CP AEGCDRRFSRSD E L T RHIR I HTGHKPFQCR ICMRNFSRSDH L T T H I R T H T GEK P F A C D

mouse YCGRKF A R SDERKRHT K IHLRQKERKSS APSA PPSAQSSASGPGGSQAGGSLCG - -NSAI  
 human YCGRKF A R SDERKRHT K IHLRQKERKSS APSA SVPAPSTASC SGGVQ PGGTLCSSNSSL  
 chick FCGRKF A R SDERKRHT K IHLRQKERKAGTAAAP - - - -QPGAGGS - - - - -  
 zebra FCGRKF A R SDERKRHT K IHLRQKERKSSSS - - - - -STGVSSSER - - - - -  
 xenopus YCGRKF A R SDERKRHT K IHLRQKERKNSATAAWRQHVARTSLKPSGGRDRQ - - - -PCAL

mouse GG - PLAS CTSRTRTP - -  
 human GGGPLAP CSSRTRTP - -  
 chick - GAALGP CAARTRTP - -  
 zebra - GVATSI C SSSSNQ - - -  
 xenopus LGPAAAHWDS IDPNRTG

Figure S1

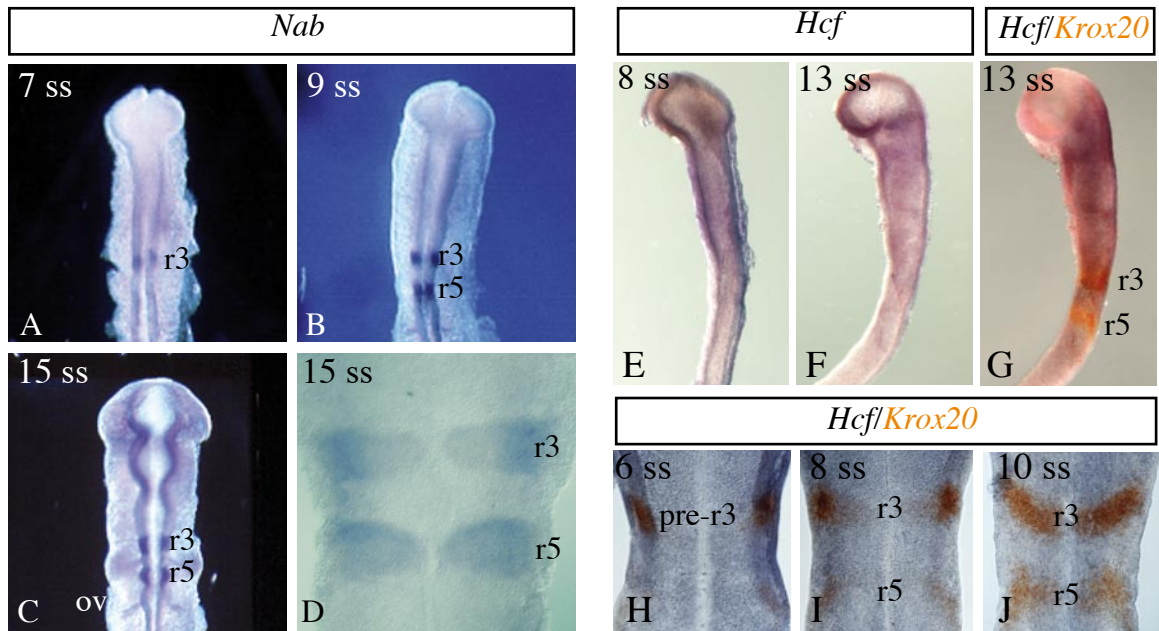

Figure S2
